# Supplementary material for: The ACHRU-CPP versus usual care for older adults with type-2 diabetes and multiple chronic conditions and their family caregivers: study protocol for a randomized controlled trial
Source: PubMed Central journal article supplement (PMC5294729; doi:10.1186/s13063-017-1795-9), 2017-02-06
Supplement: 13063_2017_1795_MOESM2_ESM.pdf [file 13063_2017_1795_MOESM2_ESM.pdf]

### Graphical Depiction of Intervention Compared to Control Group

| Timeline                   | Intervention                                                                                                                                                                                                                                                                                                                            | Control<br>Usual Care                                                               |
|----------------------------|-----------------------------------------------------------------------------------------------------------------------------------------------------------------------------------------------------------------------------------------------------------------------------------------------------------------------------------------|-------------------------------------------------------------------------------------|
| Training                   |                                                                                      |                                                                                     |
| Recruitment                |                                                                                                                                                                                                                                                        |  |
| Baseline (T <sub>1</sub> ) |                                                                                                                                                                                                                                                        |  |
| Randomization              |                                                                                                                                                                                                                                                        |  |
| 1 Month                    |     |  |
| 2 Months                   |                                                                                      |  |
| 3 Months                   |     |  |
| 4 Months                   |                                                                                      |  |
| 5 Months                   |     |  |
| 6 Months                   |                                                                                      |  |
| 6 Month (T <sub>2</sub> )  |                                                                                                                                                                                                                                                        |  |

|                                                                                     |                                                                                                                                                                                         |
|-------------------------------------------------------------------------------------|-----------------------------------------------------------------------------------------------------------------------------------------------------------------------------------------|
|  | Training of the Research Assistants (RA)                                                                                                                                                |
|  | Training of the Intervention Team                                                                                                                                                       |
|  | Training of Recruiter                                                                                                                                                                   |
|  | Recruiter identifies interested and eligible clients                                                                                                                                    |
|  | RA conducts in-home interviews to explain, screen, consent and administer baseline survey. The family caregiver is invited to complete a questionnaire and return in person or by mail. |
|  | Randomization                                                                                                                                                                           |
|  | In-home or clinic visit [maximum of 3 and minimum of 1, tailored to client needs]                                                                                                       |
|  | Usual diabetes care                                                                                                                                                                     |
|  | Group wellness session [maximum of 6 and minimum of 1, tailored to group needs]                                                                                                         |
|  | Monthly case-conference [client care plan and progress review, group wellness session planning]                                                                                         |
|  | RA administers 6-month survey for clients and family caregivers.                                                                                                                        |

LEGEND:  Fixed Component  Flexible Component (adapted from Perera et al 2007)[49]
