# Supplementary material for: The ACHRU-CPP versus usual care for older adults with type-2 diabetes and multiple chronic conditions and their family caregivers: study protocol for a randomized controlled trial
Source: PubMed Central journal article supplement (PMC5294729; doi:10.1186/s13063-017-1795-9), 2017-02-06
Supplement: 13063_2017_1795_MOESM3_ESM.pdf [file 13063_2017_1795_MOESM3_ESM.pdf]

## Fidelity Checklist

| Program Components                                                                                                                                                                                                                                                        | Data Source(s)        |
|---------------------------------------------------------------------------------------------------------------------------------------------------------------------------------------------------------------------------------------------------------------------------|-----------------------|
| <i>Staffing and Supervision</i>                                                                                                                                                                                                                                           |                       |
| <ul style="list-style-type: none"> <li>Interventionists receive training prior to starting the program</li> <li>Interventionists meet with investigators on a monthly basis</li> <li>RAs receive training prior to interviews and administering questionnaires</li> </ul> | Record of attendance  |
| <i>Home Visits</i>                                                                                                                                                                                                                                                        |                       |
| <ul style="list-style-type: none"> <li>Initial home visit conducted by the RN &amp; RD</li> <li>Follow up interim visit by RN or RD</li> <li>Follow up visit by the RN or RD at 5 months</li> </ul>                                                                       | Provider Log sheet    |
| <ul style="list-style-type: none"> <li>Screening for diabetes-related complications and comorbidities</li> <li>Review of medications</li> </ul>                                                                                                                           | Home Visit Record     |
| <ul style="list-style-type: none"> <li>Assessment of self-management of T2DM</li> <li>Use of motivational interviewing and problem-solving to foster behavioural change and encourage self-care</li> </ul>                                                                | Home Visit Record     |
| <i>Monthly Group Sessions</i>                                                                                                                                                                                                                                             |                       |
| <ul style="list-style-type: none"> <li>Participation in the program</li> </ul>                                                                                                                                                                                            | Provider Log sheet    |
| <ul style="list-style-type: none"> <li>Content of the program</li> </ul>                                                                                                                                                                                                  | Program Documentation |
| <ul style="list-style-type: none"> <li>Provision of transportation (if needed)</li> </ul>                                                                                                                                                                                 | Coordinator's notes   |
| <i>Care Coordination</i>                                                                                                                                                                                                                                                  |                       |
| <ul style="list-style-type: none"> <li>RN helps clients access necessary supports and services in the community as needed</li> </ul>                                                                                                                                      | Client Care-plan      |
| <i>Monthly Case Conferences</i>                                                                                                                                                                                                                                           |                       |
| <ul style="list-style-type: none"> <li>Collaboration and coordination of program components</li> </ul>                                                                                                                                                                    | Team Meeting Record   |
| <ul style="list-style-type: none"> <li>Case conference discussions help the intervention team develop and implement a client-centred care-plan for the group program</li> </ul>                                                                                           | Client Care-plan      |
